# Supplementary material
Source: PubMed Central journal article supplement (PMC8294184)
Supplement: NIHMS1718305-supplement-supplementary_information.pdf [file NIHMS1718305-supplement-supplementary_information.pdf]

---

**Supplementary information**

---

**Brain ethanol metabolism by astrocytic  
ALDH2 drives the behavioural effects of  
ethanol intoxication**

---

In the format provided by the  
authors and unedited

1 **Supplementary Table 1** Quantitative data for colocalization of GFAP with ALDH2  
 2 in mouse cerebellum ( $n=3$ ).

| Group | cells |       | Colocalization | Colocalization /GFAP (%) | Average (mean±s.e.m) |
|-------|-------|-------|----------------|--------------------------|----------------------|
|       | GFAP  | ALDH2 | GFAP vs. ALDH2 |                          |                      |
| Mouse | 71    | 67    | 67             | 94.36                    |                      |
|       | 84    | 78    | 76             | 90.47                    | 94.67±2.52           |
|       | 124   | 124   | 123            | 99.19                    |                      |

3

4 **Supplementary Table 2** Quantitative data for colocalization of ALDH1L1 with  
 5 ALDH2 in mouse and human cerebellum ( $n=3$ ).

| Group | cells   |       | Colocalization    | Colocalization /ALDH1L1 (%) | Average (mean±s.e.m) |
|-------|---------|-------|-------------------|-----------------------------|----------------------|
|       | ALDH1L1 | ALDH2 | ALDH1L1 vs. ALDH2 |                             |                      |
| Mouse | 156     | 175   | 108               | 69.23                       |                      |
|       | 204     | 241   | 116               | 56.86                       | 65.88±4.56           |
|       | 116     | 128   | 83                | 71.55                       |                      |
| Human | 148     | 156   | 114               | 77.03                       |                      |
|       | 176     | 191   | 136               | 77.27                       | 81.68±4.53           |
|       | 378     | 443   | 343               | 90.74                       |                      |

6

7 **Supplementary Table 3 Key resources table**

| Reagent or Resource           | Source                          | Identifier     |
|-------------------------------|---------------------------------|----------------|
| <b><u>RNAScope Probes</u></b> |                                 |                |
| Mm ALDH2 Probe                | Advanced Cell Diagnostics, Inc. | NM_009656.4    |
| Mm Cre Probe                  | Advanced Cell Diagnostics, Inc. | KC845567.1     |
| Mm MAP2 Probe                 | Advanced Cell Diagnostics, Inc. | NM_001039934.1 |
| Mm GFAP Probe                 | Advanced Cell Diagnostics, Inc. | NM_001131020.1 |
| Mm EGFP Probe                 | Advanced Cell Diagnostics, Inc. | U55763.1       |
| Mm PcP2 Probe                 | Advanced Cell Diagnostics, Inc. | NM_001129804.1 |
| Hs PcP2 Probe                 | Advanced Cell Diagnostics, Inc. | NM_174895.2    |
| Hs ALDH2 Probe                | Advanced Cell Diagnostics, Inc. | NM_000690.3    |

---

|                                 |                                 |                |
|---------------------------------|---------------------------------|----------------|
| Hs ALDH1L1 Probe                | Advanced Cell Diagnostics, Inc. | NM_001270364.1 |
| Cyanine 1                       | Perkin Elmer                    | NEL756001KT    |
| Cyanine 3                       | Perkin Elmer                    | FP1170         |
| Cyanine 5                       | Perkin Elmer                    | FP1171         |
| Antifade Reagent                | Thermo Fisher Scientific        | P36930         |
| <b><u>Antibodies</u></b>        |                                 |                |
| Goat anti-ALDH2                 | Santa Cruz Biotechnology        | sc-48837       |
| Mouse anti-actin                | Cell signaling technology       | 3700S          |
| Rabbit anti-GABA                | Abcam                           | Ab8891         |
| Goat anti-GFAP                  | Santa Cruz Biotechnology        | sc-6171        |
| Alexa 488 donkey anti-rabbit    | Thermo Fisher                   | A21206         |
| Alexa 568 donkey anti goat      | Thermo Fisher                   | A11057         |
| Donkey anti-goat                | Abcam                           | Ab6885         |
| <b><u>Virus Strains</u></b>     |                                 |                |
| AVV5-GFAPCre                    | Addgene                         | 105550-AAV5    |
| AVV9-Synt1Cre                   | Addgene                         | 105553-AVV9    |
| <b><u>Chemicals</u></b>         |                                 |                |
| D-AP5                           | TOCRIS                          | 0106           |
| DNQX                            | TOCRIS                          | 2312           |
| TTX                             | BIOTIUM                         | 00061          |
| QX-314                          | TOCRIS                          | 552233         |
| Bicuculline                     | EMD Millipore Corp.             | 14343          |
| Sodium acetate                  | Sigma-Aldrich                   | S2889          |
| Ethyl alcohol                   | Sigma-Aldrich                   | E-7148         |
| QIAzol® lysis reagents          | QIAGEN sciences                 | 79306          |
| TaqMan fast advance Master mix  | Thermo Fisher Scientific        | 4444556        |
| Phosphatase inhibitor Cocktails | Cell signaling technology       | 5871S          |
| PMSF                            | Cell signaling technology       | 8553S          |
| RIPA buffer                     | Cell signaling technology       | 9806S          |

---

---

|                                                       |                                 |           |
|-------------------------------------------------------|---------------------------------|-----------|
| Paraformaldehyde                                      | Alfa Aesar Chemical             | J61899    |
| Fetal bovine serum                                    | Gibco                           | A31604-01 |
| RNA later™ Solu                                       | Thermo Fisher Scientific        | Am7021    |
| <sup>13</sup> C-1-Acetate                             | Sigma-Aldrich                   | 279293    |
| <sup>13</sup> C-1-GABA                                | Sigma-Aldrich                   | 678236    |
| Cyanamide                                             | Sigma-Aldrich                   | 187364    |
| <b><u>Commercial Assays</u></b>                       |                                 |           |
| Pierce® BCA protein assay kit                         | Thermo Fisher Scientific        | 23228     |
| Reverse Transcription kit                             | QIAGEN sciences                 | 205311    |
| Mitochondrial ALDH2 enzyme activity kit               | Abcam                           | Ab115348  |
| RNAscope® H2O2 and protein reagents                   | Advanced Cell Diagnostics, Inc. | 322381    |
| RNAscope® wash buffer solution                        | Advanced Cell Diagnostics, Inc. | 310091    |
| RNAscope® multiplex fluorescent detection reagents v2 | Advanced Cell Diagnostics, Inc. | 323110    |
| Jess/Wes separation                                   | Jess & Wes                      | SM-W004   |
| RNeasy® lipid tissue Mini kit                         | QIAGEN                          | 74804     |
| Anti-mouse detection module                           | Jess & Wes                      | DM-001    |
|                                                       | Jess & Wes                      | DM-002    |

---
